# Supplementary material
Source: publisher site journal article supplement (https://kjim.org/upload/media/kjim-2025-281-Supplementary-Table-2.pdf)
Supplement: Supplementary file 1 [file kjim-2025-281-Supplementary-Table-2.pdf]

Supplementary Table 2. Search strategies

| Database         | Search number | Search terms                                                                                                                                                                                                                                                                                                                        | Search results |
|------------------|---------------|-------------------------------------------------------------------------------------------------------------------------------------------------------------------------------------------------------------------------------------------------------------------------------------------------------------------------------------|----------------|
| PubMed           | #1            | Multiple myeloma[mh] OR multiple myeloma*[tw]                                                                                                                                                                                                                                                                                       | 65,866         |
| PubMed           | #2            | Peripheral Nervous System Diseases[mh:noexp] OR Neurotoxicity Syndromes[mh:noexp] OR Neuralgia[mh:noexp] OR neuropath*[tw] OR neurotoxic*[tw] OR neuralgia*[tw] OR peripheral nervous system disease*[tw] OR peripheral nervous system disorder*[tw] OR peripheral nerv* disease*[tw] OR peripheral nerv* disorder*[tw] OR CIPN[tw] | 285,457        |
| PubMed           | #3            | Patient Reported Outcome Measures[mh:noexp] OR patient-report* outcome*[tw] OR self-report* outcome*[tw] OR PROM[tw] OR PROMs[tw] OR self-report* questionnaire*[tw] OR patient-report* questionnaire*[tw] OR patient-report* symptom[tw] OR self-report* symptom*[tw]                                                              | 81,633         |
| PubMed           | #4            | QLQ-MY20[tw] OR QLQ-C30[tw] OR QLQ-CIPN20[tw] OR QLQMY20[tw] OR QLQC30[tw] OR QLQCIPN20[tw]                                                                                                                                                                                                                                         | 6,382          |
| PubMed           | #5            | (European Organisation for Research and Treatment of Cancer[tw] OR EORTC[tw]) AND (Quality of Life Questionnaire[tw] OR QLQ[tw])                                                                                                                                                                                                    | 6,897          |
| PubMed           | #6            | Symptom Assessment[mh] OR Outcome Assessment, Health Care[mh:noexp] OR assessment*[tw] OR scale*[tw] OR diagnostic*[tw] OR measure*[tw]                                                                                                                                                                                             | 8,576,490      |
| PubMed           | #7            | #3 OR #4 OR #5 OR #6                                                                                                                                                                                                                                                                                                                | 8,596,879      |
| PubMed           | #8            | #1 AND #2 AND #7                                                                                                                                                                                                                                                                                                                    | 304            |
| PubMed           | #9            | (Animals[mh] NOT Humans[mh]) OR Models, Animal[mh:noexp] OR Disease Models, Animal[mh] OR Animal Experimentation[mh]                                                                                                                                                                                                                | 5,522,823      |
| PubMed           | #10           | #8 NOT #9                                                                                                                                                                                                                                                                                                                           | 296            |
| Embase           | #1            | ('multiple myeloma'/de OR 'multiple myeloma':ti,ab,kw)                                                                                                                                                                                                                                                                              | 121,983        |
| Embase           | #2            | ('peripheral neuropathy'/de OR 'chemotherapy-induced peripheral neuropathy'/de OR neurotoxicity/de OR neuralgia/de OR (neuropath* OR neurotoxic* OR neuralgia* OR CIPN):ti,ab,kw OR ('peripheral nerv*' NEXT/2 (disease* OR disorder*)):ti,ab,kw)                                                                                   | 453,580        |
| Embase           | #3            | ('patient-reported outcome'/de OR ((patient-report* OR self-report*) NEXT/2 (outcome* OR questionnaire* OR symptom*)):ti,ab,kw OR (PROM OR PROMs):ti,ab,kw)                                                                                                                                                                         | 143,371        |
| Embase           | #4            | (QLQ-MY20 OR QLQ-C30 OR QLQ-CIPN20 OR QLQMY20 OR QLQC30 OR QLQCIPN20):ti,ab,kw                                                                                                                                                                                                                                                      | 13,601         |
| Embase           | #5            | ('European Organisation for Research and Treatment of Cancer' OR EORTC):ti,ab,kw AND ('Quality of Life Questionnaire' OR QLQ):ti,ab,kw                                                                                                                                                                                              | 14,338         |
| Embase           | #6            | ('symptom assessment'/de OR 'outcome assessment'/de OR (assessment* OR scale* OR diagnostic* OR measure*):ti,kw OR ((outcome* OR symptom* OR neuropath* OR neurotoxic* OR neuralgia* OR CIPN) NEXT/1 (assessment* OR measure*)):ti,ab,kw)                                                                                           | 2,718,137      |
| Embase           | #7            | #3 OR #4 OR #5 OR #6                                                                                                                                                                                                                                                                                                                | 2,807,354      |
| Embase           | #8            | #1 AND #2 AND #7                                                                                                                                                                                                                                                                                                                    | 664            |
| Embase           | #9            | (animal/exp NOT human/exp) OR 'animal model'/exp OR 'animal experiment'/exp OR [animal cell]/lim OR [animal experiment]/lim OR [animal model]/lim OR [animal tissue]/lim                                                                                                                                                            | 7,517,122      |
| Embase           | #10           | #8 NOT #9                                                                                                                                                                                                                                                                                                                           | 654            |
| Embase           | #11           | #10 NOT ('conference abstract'/it OR 'conference paper'/it OR 'conference review'/it)                                                                                                                                                                                                                                               | 407            |
| Embase           | #12           | #10 NOT #11                                                                                                                                                                                                                                                                                                                         | 247            |
| Cochrane Library | #1            | [mh "Multiple myeloma"] OR (multiple NEXT myeloma*):ti,ab,kw                                                                                                                                                                                                                                                                        | 6,751          |
| Cochrane Library | #2            | [mh ^"Peripheral Nervous System Diseases"] OR [mh ^"Neurotoxicity Syndromes"] OR [mh ^Neuralgia] OR (neuropath* OR neurotoxic* OR neuralgia* OR CIPN):ti,ab,kw OR (peripheral NEXT nerv* NEXT/2 (disease* OR disorder*)):ti,ab,kw                                                                                                   | 24,768         |

**Supplementary Table 2. Continued**

| Database         | Search number | Search terms                                                                                                                                                                                                                                                                                                                                          | Search results |
|------------------|---------------|-------------------------------------------------------------------------------------------------------------------------------------------------------------------------------------------------------------------------------------------------------------------------------------------------------------------------------------------------------|----------------|
| Cochrane Library | #3            | [mh ^"Patient Reported Outcome Measures"] OR ((patient-report* OR self-report*) NEXT/2 (outcome* OR questionnaire* OR symptom*)):ti,ab,kw OR (PROM OR PROMs):ti,ab,kw                                                                                                                                                                                 | 441,174        |
| Cochrane Library | #4            | (QLQ-MY20 OR QLQ-C30 OR QLQ-CIPN20 OR QLQMY20 OR QLQC30 OR QLQCIPN20):ti,ab,kw                                                                                                                                                                                                                                                                        | 5,832          |
| Cochrane Library | #5            | ("European Organisation for Research and Treatment of Cancer" OR EORTC):ti,ab,kw AND ("Quality of Life Questionnaire" OR QLQ):ti,ab,kw                                                                                                                                                                                                                | 6,807          |
| Cochrane Library | #6            | [mh "Symptom Assessment"] OR [mh ^"Outcome Assessment, Health Care"] OR (assessment* OR scale* OR diagnostic* OR measure*):ti,kw OR ((outcome* OR symptom* OR neuropath* OR neurotoxic* OR neuralgia* OR CIPN) NEXT/1 (assessment* OR measure*)):ti,ab,kw                                                                                             | 431,428        |
| Cochrane Library | #7            | #3 OR #4 OR #5 OR #6                                                                                                                                                                                                                                                                                                                                  | 739,826        |
| Cochrane Library | #8            | #1 AND #2 AND #7                                                                                                                                                                                                                                                                                                                                      | 219            |
| KoreaMed         | #1            | "multiple myeloma"[MH] OR "multiple myeloma"[ALL] OR "multiple myelomas"[ALL]                                                                                                                                                                                                                                                                         | 668            |
| KoreaMed         | #2            | "Peripheral Nervous System Diseases"[MH] OR "Neurotoxicity Syndromes"[MH] OR Neuralgia[MH] OR neuropath*[ALL] OR neurotoxic*[ALL] OR neuralgia*[ALL] OR "peripheral nervous system disease"[ALL] OR "peripheral nervous system disorder"[ALL] OR "peripheral nervous system diseases"[ALL] OR "peripheral nervous system disorders"[ALL] OR CIPN[ALL] | 4,358          |
| KoreaMed         | #3            | #1 AND #2                                                                                                                                                                                                                                                                                                                                             | 18             |
